# Supplementary material
Source: Springer Nature journal article supplement (https://www.springermedizin.de/resource/supplementary/13229_2009_8_MOESM1_ESM.pdf/9675988)

### SRS Scores for subjects with no diagnosis

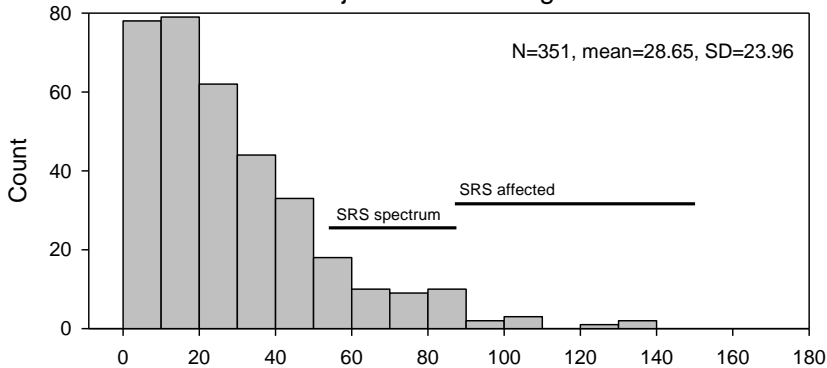

### SRS scores for subjects with ASDs

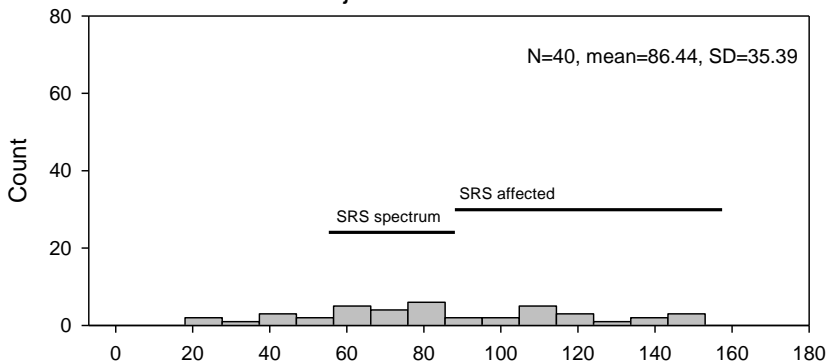

### SRS scores for subjects with Autistic Disorder

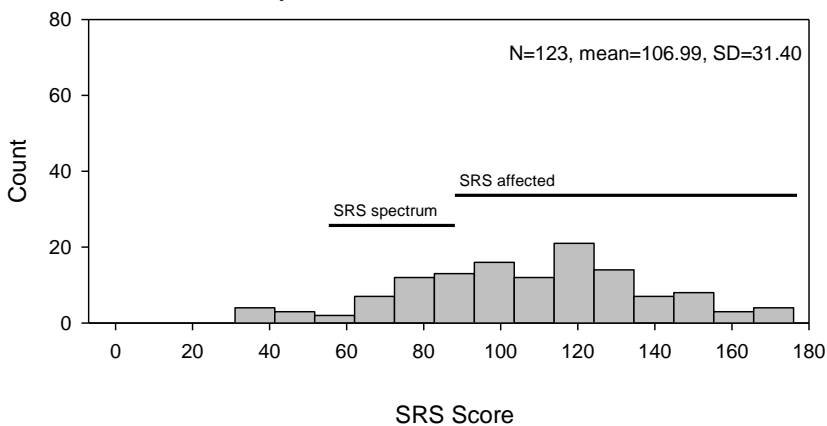

Supplement: MOESM1 [file 9675988]
